# Supplementary material
Source: publisher figshare collection journal article supplement (https://asha.figshare.com/ndownloader/files/11161109)

The four versions of each stimulus type (example based on the vowel pair /I/–/i:/): original short, original long, lengthened, and shortened. Contrasts between the different versions of these stimulus types form the basis for the different conditions of a same–different task: (a) the original short vowel and the original long vowel for the spectro-temporal condition; (b) the original short vowel and the lengthened short vowel, or the original long vowel and the shortened long vowel, for the temporal condition; and (c) the original short vowel and the shortened long vowel, or the original long vowel and the lengthened short vowel, for the spectral condition.

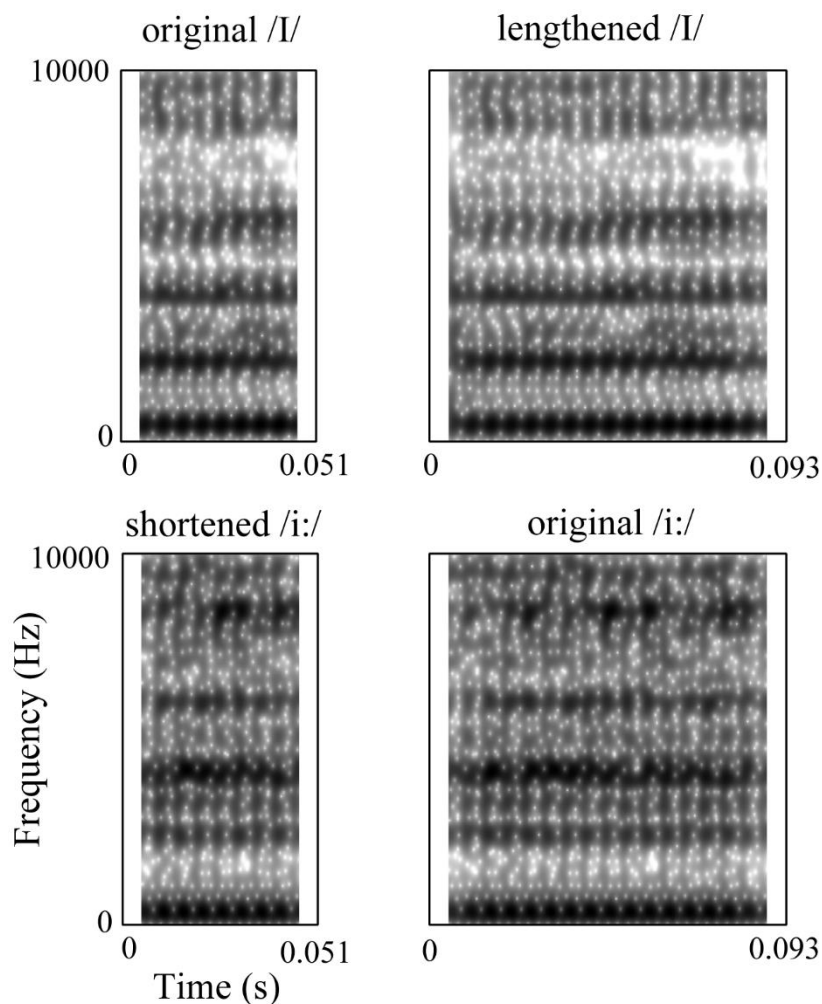

Supplement: Supplementary file 1 [file 11161109]
